# Ancestral reconstruction of sunflower karyotypes reveals non-random chromosomal evolution

Kate L. Ostevik<sup>1,2</sup>, Kieran Samuk<sup>1</sup>, and Loren H. Rieseberg<sup>2</sup>

1. Department of Biology, Duke University, Durham, NC, 27701
2. Department of Botany, University of British Columbia, Vancouver, BC, Canada, V6T 1Z4

Running Title: Chromosomal evolution in sunflower

Keywords: chromosomal rearrangement, synteny block, *Helianthus*, syntR, dot plot

Corresponding author:

Kate Ostevik

Box 90338, 137 Biological Sciences, 130 Science Drive, Durham, NC, 27708

984-227-0832

kate.ostevik@gmail.com

## 1 Abstract

2

3 Mapping the chromosomal rearrangements between species can inform our understanding of genome  
4 evolution, reproductive isolation, and speciation. Here we present a novel algorithm for identifying  
5 regions of synteny in pairs of genetic maps, which is implemented in the accompanying R package,  
6 syntR. The syntR algorithm performs as well as previous ad-hoc methods while being systematic,  
7 repeatable, and is applicable to mapping chromosomal rearrangements in any group of species. In  
8 addition, we present a systematic survey of chromosomal rearrangements in the annual sunflowers,  
9 which is a group known for extreme karyotypic diversity. We build high-density genetic maps for two  
10 subspecies of the prairie sunflower, *Helianthus petiolaris* ssp. *petiolaris* and *H. petiolaris* ssp. *fallax*.  
11 Using syntR, and we identify blocks of synteny between these two subspecies and previously published  
12 high-density genetic maps. We reconstruct ancestral karyotypes for annual sunflowers using those  
13 synteny blocks and conservatively estimate that there have been 7.9 chromosomal rearrangements  
14 per million years – a high rate of chromosomal evolution. Although the rate of inversion is even higher  
15 than the rate of translocation in this group, we further find that every extant karyotype is distinguished  
16 by between 1 and 3 translocations involving only 8 of the 17 chromosomes. This non-random exchange  
17 suggests that specific chromosomes are prone to translocation and may thus contribute  
18 disproportionately to widespread hybrid sterility in sunflowers. These data deepen our understanding  
19 of chromosome evolution and confirm that *Helianthus* has an exceptional rate of chromosomal  
20 rearrangement that may facilitate similarly rapid diversification.

## 21 Introduction

22

23 Organisms vary widely in the number and arrangement of their chromosomes – i.e., their karyotype.  
24 Interestingly, karyotypic differences are often associated with species boundaries and, therefore,  
25 suggest a link between chromosomal evolution and speciation (White 1978, King 1993). Indeed, it is  
26 well established that chromosomal rearrangements can contribute to reproductive isolation.  
27 Individuals heterozygous for divergent karyotypes are often sterile or inviable (King 1987, Lai et al.

28 2005, Stathos and Fishman 2014). Apart from directly causing hybrid sterility and inviability,  
29 chromosomal rearrangements can also facilitate the evolution of other reproductive barriers by  
30 extending genomic regions that are protected from introgression (Noor et al. 2001, Rieseberg 2001),  
31 accumulating genetic incompatibilities (Navarro and Barton 2003), and simplifying reinforcement  
32 (Trickett and Butlin 1994). Despite its prevalence and potentially important role in speciation, the  
33 general patterns of karyotypic divergence are still not well understood. Mapping and characterizing  
34 chromosomal rearrangements in many taxa is a critical step towards understanding their evolutionary  
35 dynamics.

36

37 The genus *Helianthus* (sunflowers) is well known to have particularly labile genome structure and is  
38 thus a viable system in which to map and characterize a variety of rearrangements. These sunflowers  
39 have several paleopolyploidy events in their evolutionary history (Barker et al. 2008, Barker et al. 2016,  
40 Badouin et al. 2017), have given rise to three homoploid hybrid species (Rieseberg 1991), and are  
41 prone to transposable element activity (Kawakami et al. 2011, Staton et al. 2012). Evidence in the form  
42 of hybrid pollen inviability, abnormal chromosome pairings during meiosis, and genetic map  
43 comparisons suggests that *Helianthus* karyotypes are unusually diverse (Heiser 1947, Heiser 1951,  
44 Heiser 1961, Whelan 1979, Chandler 1986, Rieseberg et al. 1995, Quillet et al. 1995, Burke et al. 2004,  
45 Heesacker et al. 2009, Barb et al. 2014). In fact, annual sunflowers have one of the highest described  
46 rates of chromosomal evolution across all plants and animals (Burke et al. 2004).

47

48 Studying chromosomal evolution within any group requires high-density genetic maps. Recently, Barb  
49 et al. (2014) built high-density genetic maps for the sunflower species *H. niveus* ssp. *tephrodes* and *H.*  
50 *argophyllus* and compared them to *H. annuus*. This analysis precisely mapped previously inferred  
51 karyotypes (Heiser 1951, Chandler 1986, Quillet et al. 1995), but only captured a small amount of the  
52 chromosomal variation in the annual sunflowers. For example, comparisons of genetic maps with  
53 limited marker density suggest that several chromosomal rearrangements differentiate *H. petiolaris*  
54 from *H. annuus* and (Rieseberg et al. 1995, Burke et al. 2004) and evidence from cytological surveys  
55 suggests that subspecies within *H. petiolaris* subspecies carry divergent karyotypes (Heiser 1961).  
56 Adding high-density genetic maps of *H. petiolaris* subspecies to the Barb et al. (2014) analysis will allow

57 us to: (1) precisely track additional rearrangements, (2) reconstruct ancestral karyotypes for the group,  
58 and (3) untangle overlapping rearrangements that can be obscured by directly comparing present-day  
59 karyotypes.

60

61 Another critical part of a multi-species comparative study of chromosome evolution using genetic map  
62 data is a systematic and repeatable method for identifying syntenic chromosomal regions (*sensu*  
63 Pevzner and Tesler 2003). These methods are especially important for cases with high marker density  
64 because breakpoints between synteny blocks can be blurred by mapping error, micro-rearrangements,  
65 and paralogy (Hackett and Broadfoot 2003, Choi et al. 2007, Barb et al. 2014, Bilton et al. 2018). In  
66 previous studies, synteny blocks have been found by a variety of ad-hoc methods, including counting  
67 all differences in marker order (Wu and Tanksley 2010), by visual inspection (Burke et al. 2004, Marone  
68 et al. 2012, Latta et al. 2019), or by manually applying simple rules like size thresholds (Heesacker et al.  
69 2009, Barb et al. 2014, Rueppell et al. 2016) and Spearman's rank comparisons (Berdan et al. 2014,  
70 Schlautman et al. 2017). However, these methods become intractable and prone to error when applied  
71 to very dense genetic maps. Furthermore, to our knowledge, there is no software available that  
72 identifies synteny blocks based on relative marker positions alone (i.e., without requiring reference  
73 genomes, sequence data, or markers with known orientations).

74

75 Here, with the goal of understanding chromosome evolution in *Helianthus* and more generally, we  
76 aimed to: (1) build high-density genetic maps for two subspecies of *Helianthus petiolaris*, (2) develop a  
77 method and software to systematically and repeatably identify synteny blocks from any number of  
78 paired genetic map positions, (3) reconstruct ancestral karyotypes for a subsection of annual  
79 sunflowers, and (4) detect general patterns of chromosomal rearrangement in *Helianthus*.

## 80 Methods

### 81 Study system

82

83 We focused on five closely related diploid ( $2n = 34$ ) taxa from the annual clade of the genus *Helianthus*  
84 (Fig 1). These sunflowers are native to North America (Fig S1, Rogers et al. 1982) and are naturally self-  
85 incompatible (domesticated lineages of *H. annuus* are self-compatible). *Helianthus annuus* occurs  
86 throughout much of the central United States, often in somewhat heavy soils and along roadsides  
87 (Heiser 1947). *Helianthus petiolaris* occurs in sandier soils and is made up of two subspecies: *H.*  
88 *petiolaris* ssp. *petiolaris*, which is commonly found in the southern Great Plains, and *H. petiolaris* ssp.  
89 *fallax*, which is limited to more arid regions in Colorado, Utah, New Mexico, and Arizona (Heiser 1961).  
90 Where *H. petiolaris* and *H. annuus* are sympatric, gene flow occurs between the species (Strasburg and  
91 Rieseberg 2008). *Helianthus argophyllus* is primarily found along the east coast of Texas where it also  
92 overlaps and hybridizes with *H. annuus* (Baute et al. 2016). Finally, *H. niveus* ssp. *tephrodes* is a  
93 facultative perennial that grows in dunes from the southwestern US into Mexico.

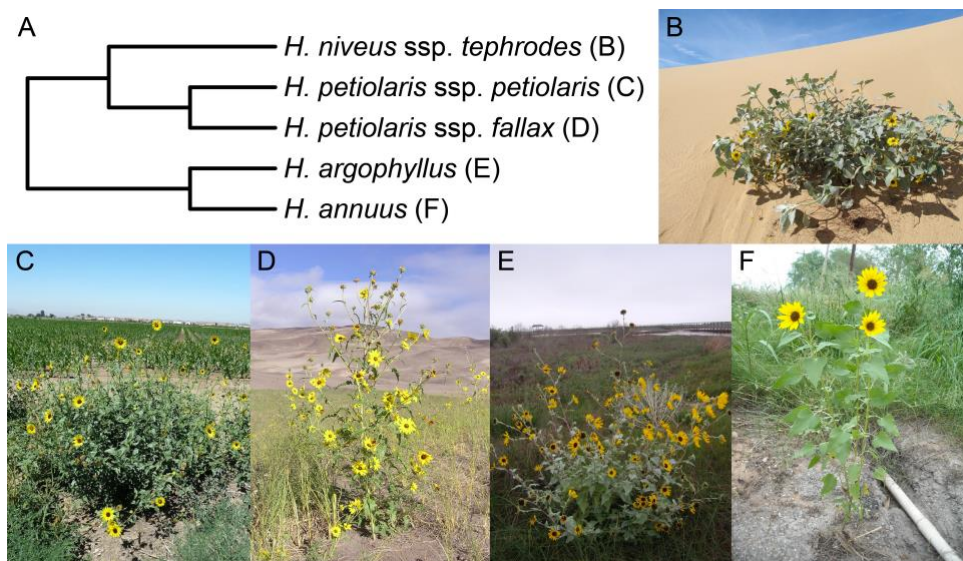

94  
95 Figure 1 - The sunflower taxa used in this study. A) Phylogenetic relationships based on Stephens et al. (2015)  
96 and Baute et al. (2016). B) *H. niveus* ssp. *tephrodes*. C) *H. petiolaris* ssp. *petiolaris*. D) *H. petiolaris* ssp. *fallax*. E)  
97 *H. argophyllus*. F) *H. annuus*. Photo credits: Brook Moyers (B, C, E & F) and Rose Andrew (D).

## 98 Controlled crosses

99

100 To make genetic maps, we crossed an outbred individual with presumably high heterozygosity from  
101 each *H. petiolaris* subspecies to a homozygous inbred line of domesticated sunflower and genotyped

102 the resulting F1 offspring. This test-cross design allows us to infer where recombination occurred in the  
103 heterozygous parents because we can reliably track the segregation of those parents' alleles against a  
104 predictable background (Fig 2).

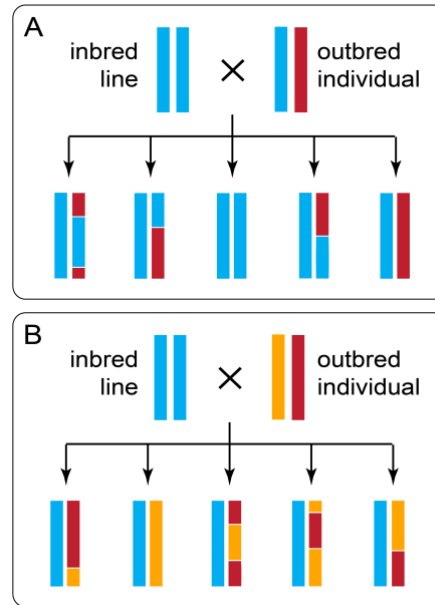

105

106 Figure 2 – Diagram showing how a test-cross can be used to map the recombination events in an outbred  
107 individual that may (A) or may not (B) share alleles with the inbred line. Each line represents a chromosome, and  
108 the colors represent ancestry.

109

110 Specifically, we used pollen from a single *H. petiolaris ssp. petiolaris* plant (PI435836) and a single *H.*  
111 *petiolaris ssp. fallax* plant (PI435768) to fertilize individuals of a highly inbred and male sterile line of *H.*  
112 *annuus* (HA89cms). The self-incompatible *H. petiolaris* accessions were collected in central Colorado  
113 (PI435836, 39.741°, -105.342°, Boulder County) and the southeast corner of New Mexico (PI435768,  
114 32.3°, -104.0°, Eddy County, Fig S1) and were maintained at large population sizes by the United States  
115 Department of Agriculture. When it was originally collected, accession PI435768 was classified *H.*  
116 *neglectus*. However, based on the location of the collection (Heiser 1961) and a more recent genetic  
117 analysis of the scale of differences between *H. petiolaris ssp. fallax* and *H. neglectus* (Raduski et al.  
118 2010), we believe that this accession should be classified *H. petiolaris ssp. fallax*.

## 119 Genotyping

120

121 We collected leaf tissue from 116 *H. annuus* x *H. petiolaris* ssp. *petiolaris* F1 seedlings and 132 *H.*  
122 *annuus* x *H. petiolaris* ssp. *fallax* F1 seedlings. We extracted DNA using a modified CTAB protocol  
123 (Doyle and Doyle 1987) and prepared individually barcoded genotyping-by-sequencing (GBS) libraries  
124 using a version the Poland et al. (2012) protocol. Our modified protocol includes steps to reduce the  
125 frequency of high-copy fragments (e.g., chloroplast and repetitive sequence) based on Shagina et al.  
126 (2010) and Matvienko et al. (2013) and steps to select specific fragment sizes for sequencing (see  
127 Ostevik 2016 appendix B for the full protocol).

128

129 Briefly, we digested 100ng of DNA from each individual with restriction enzymes (either *Pst*I-HF or *Pst*I-  
130 HF and *Msp*I) and ligated individual barcodes and common adapters to the digested DNA. We pooled  
131 barcoded fragments from up to 192 individuals, cleaned and concentrated the libraries using SeraMag  
132 Speed Beads made in-house (Rohland and Reich 2012), and amplified fragments using 12 cycles of PCR.  
133 We depleted high-copy fragments based on Todesco et al. (2019) using the following steps: (1)  
134 denature the libraries using high temperatures, (2) allow the fragments to re-hybridize, (3) digest the  
135 double-stranded fragments with duplex specific nuclease (Zhulidov et al. 2004), and (4) amplify the  
136 undigested fragments using another 12 cycles of PCR. We ran the libraries out on a 1.5% agarose gel  
137 and extracted 300-800 bp fragments using a Zymoclean Gel DNA Recovery kit (Zymo Research, Irvine,  
138 USA). Then, following additional library cleanup and quality assessment, we sequenced paired-ends of  
139 our libraries on an Illumina HiSeq 2000 (Illumina Inc., San Diego, CA, USA).

140

141 To call variants, we used a pipeline that combines the Burrows-Wheeler Aligner version 0.7.15 (BWA, Li  
142 & Durbin 2010) and the Genome Analysis Toolkit version 3.7 (GATK, McKenna et al. 2010). First, we  
143 demultiplexed the data using *sabre* (<https://github.com/najoshi/sabre>, Accessed 27 Jan 2017). Next,  
144 we aligned reads to the *H. annuus* reference (HanXRQr1.0-20151230, Badouin et al. 2017) with ‘*bwa*-  
145 *mem*’ (Li 2013), called variants with GATK ‘HaplotypeCaller’, and jointly genotyped all samples within a  
146 cross type with GATK ‘GenotypeGVCFs’. We split variants into SNPs and indels and filtered each marker  
147 type using hard-filtration criteria suggested in the GATK best practices (DePristo et al. 2011, Van der

148 Auwera et al. 2013). Specifically, we removed SNPs that had quality by depth scores (QD) less than 2,  
149 strand bias scores (FS) greater than 60, mean mapping quality (MQ) less than 40, or allele mapping bias  
150 scores (MQRankSum) less than -12.5 and indels that had  $QD < 2$  or  $FS > 200$ . After further filtering  
151 variants for biallelic and triallelic markers with genotype calls in at least 50% of individuals, we used  
152 GATK 'VariantsToTable' to merge SNPs and indels into a single variant table for each cross type.  
153  
154 Finally, we converted our variant tables into AB format, such that the heterozygous parents contribute  
155 'A' and 'B' alleles to offspring, while the *H. annuus* parent contributes exclusively 'A' alleles. At biallelic  
156 markers (Fig 2A), sites with two reference alleles became 'AA' and sites with the reference allele, and  
157 the alternate allele became 'AB'. At triallelic markers (Fig 2B), sites with the reference allele and one  
158 alternate allele became 'AA' and sites with the reference allele, and the other alternate allele became  
159 'AB'. This method randomly assigns 'A' and 'B' alleles to the homologous chromosomes in each  
160 heterozygous parent, so our genetic maps initially consisted of pairs of mirror-imaged linkage groups  
161 that we later merged.

## 162 Genetic mapping

163  
164 We used R/qtl (Broman et al. 2003) in conjunction with R/ASMap (Taylor and Butler 2017) to build  
165 genetic maps. After excluding markers with less than 20% or greater than 80% heterozygosity and  
166 individuals with less than 50% of markers scored, we used the function 'mstmap.cross' with a stringent  
167 significance threshold ( $p.value = 1 \times 10^{-16}$ ) to form conservative linkage groups. We used the function  
168 'plotRF' to identify pairs of linkage groups with unusually high recombination fractions and the function  
169 'switchAlleles' to reverse the genotype scores of one linkage group in each mirrored pair. We did this  
170 until reversing genotype scores no longer reduced the number of linkage groups.

171  
172 Using the corrected genotypes, we made new linkage groups with only the most reliable markers.  
173 Namely, we used the function 'mstmap.cross' (with the parameter values: `dist.fun = "kosambi"`, `p.value`  
174 `= 1x10-6`, `noMap.size = 2`, `noMap.dist = 5`) on markers with less than 10% missing data and without  
175 significant segregation distortion. We refined the resulting linkage groups by removing (1) markers



176 with more than three double crossovers, (2) markers with aberrant segregation patterns (segregation  
177 distortion more than two standard deviations above or below the mean segregation distortion of the  
178 nearest 20 markers), and (3) linkage groups made up of fewer than four markers.

179

180 We progressively pushed markers with increasing amounts of segregation distortion and missing data  
181 into the maps using the function 'pushCross'. After adding each batch of markers, we reordered the  
182 linkage groups and dropped markers and linkage groups as described above. Once all the markers had  
183 been pushed back, we used the function 'calc.errorlod' to identify possible genotyping errors (error  
184 scores greater than 2) and replaced those genotypes with missing data. We continued to drop linkage  
185 groups, markers, and genotypes that did not meet our criteria until none remained.

186

187 Finally, we dropped five excess linkage groups, each made up of fewer than 30 markers, from each  
188 map. The markers in these linkage groups mapped to regions of the *H. annuus* genome that were  
189 otherwise represented in the final genetic maps but could not be explained by reversed genotypes.  
190 Instead, these markers were likely polymorphic in the HA89cms individual used for crosses because of  
191 the 2-4% residual heterozygosity in sunflower inbred lines (Mandel et al. 2013).

## 192 SyntR development

193

194 To aid in the identification of chromosomal rearrangements, we developed the R package 'syntR'  
195 (code and documentation available at <http://ksamuk.github.io/syntR>). This package implements a  
196 heuristic algorithm for systematically detecting synteny blocks from marker positions in two genetic  
197 maps. The key innovation of the syntR algorithm is coupling a biologically-informed noise reduction  
198 method with a cluster identification method better suited for detecting linear (as opposed to circular)  
199 clusters of data points.

200

201 We based the syntR algorithm on the following statistical and biological properties of genetic maps and  
202 chromosomal rearrangements:

- 203 (1) Synteny blocks appear as contiguous sets of orthologous markers in the same or reversed order  
204 in pairs of genetic maps (Pevzner and Tesler 2003, Choi et al. 2007).
- 205 (2) The inferred order of markers in individual genetic maps is subject to error due to genotyping  
206 errors and missing data (Hackett and Broadfoot 2003). This error manifests as slight differences  
207 in the order of nearby markers within a linkage group between maps. This mapping error  
208 (which we denote ‘error rate one’) results in uncertainty in the sequence of markers in synteny  
209 blocks.
- 210 (3) In genomes with a history of duplication, seemingly orthologous markers can truly represent  
211 paralogs. These errors (‘error rate two’) look like tiny translocations and also disrupt marker  
212 orders within synteny blocks.
- 213 (4) When comparing genetic maps derived from genomes without duplications or deletions, every  
214 region of each genome will be uniquely represented in the other. Because syntR is made for  
215 comparing homoploid genomes with this property, we expect each point in each genetic map  
216 to be contained within a single unique synteny block. Therefore, overlaps between synteny  
217 blocks are likely errors. Note that this assumption precludes the identification of duplications.
- 218 (5) Chromosomal rearrangements can be of any size, but smaller rearrangements are difficult to  
219 distinguish from error (Pevzner and Tesler 2003). A key decision in synteny block detection is  
220 thus the choice of a detection threshold for small rearrangements, which results in a trade-off  
221 between error reduction and the minimum size of detectable synteny blocks.

222

223 The first step of the syntR algorithm is to smooth over mapping error (error rate one) by identifying  
224 highly localized clusters of markers based on a genetic distance threshold (cM) in both maps using  
225 hierarchical clustering (Fig 3a). The number of clusters formed is determined by the parameter  
226 maximum cluster range ( $CR_{max}$ ) that defines the maximum genetic distance (cM) that any cluster can  
227 span in either genetic map. After determining these initial clusters, we smooth the maps by collapsing  
228 each multi-marker cluster down into a single representative point (the centroid of the cluster) for  
229 processing in subsequent steps. Next, we address errors introduced by poorly mapped or paralogous  
230 markers (error rate two) by flagging and removing outlier clusters that do not have a neighboring

231 cluster within a specified maximum genetic distance (cM), a parameter we denote nearest neighbor  
232 distance ( $NN_{dist}$ , Fig 3b).

233

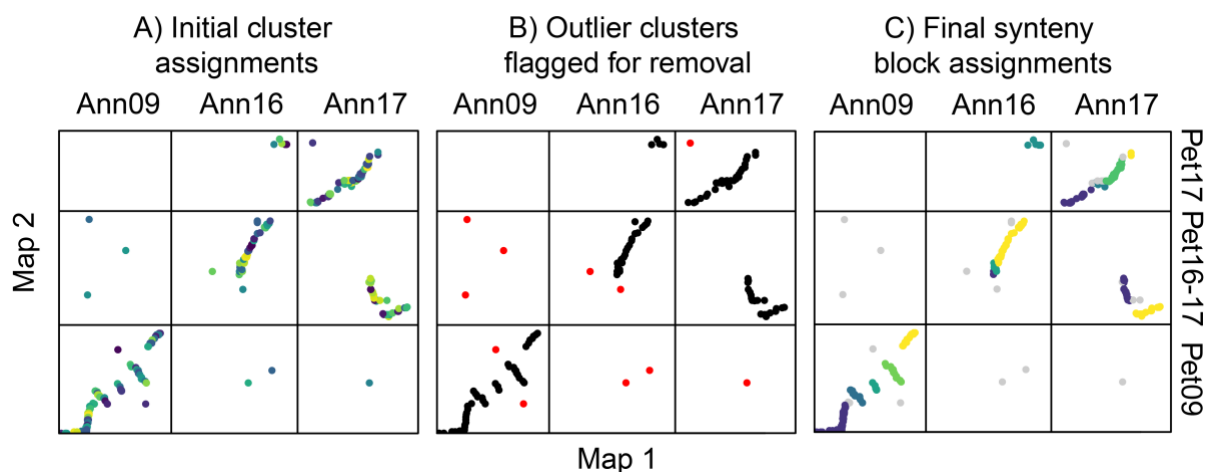

234

235

236

237

238

239

240

241

242

243

244

245

246

247

248

249

250

251

252

253

Figure 3 – The stages of the syntR algorithm. Each plot shows the relationship between markers or clusters of markers from three chromosomes in two genetic maps. A) Highly localized markers are clustered. Each shade represents an individual cluster of markers that will be collapsed into a single representative point. B) Clusters without another cluster nearby are dropped. Red points represent clusters without a neighbor within 10 cM. C) Clusters are grouped into synteny blocks based on their rank positions. Grey points represent markers that were dropped in previous steps, and each other color represents a different synteny block.

After the noise reduction steps, we define preliminary synteny blocks using a method similar to the “friends-of-friends” clustering algorithm (Huchra and Geller 1982). First, we transform the genetic position of each cluster into rank order to minimize the impact of gaps between markers. We then group clusters that are (1) adjacent in rank position in one of the maps and (2) within two rank positions in the other map (Fig S2). This grouping method further reduces the effect of mapping error by aggregating over pairs (but not triplets) of clusters that have reversed orientations. If a minimum number of clusters per synteny block has been (optionally) defined, we sequentially eliminate blocks that fall below the minimum number of clusters, starting with blocks made up of one cluster and ending with blocks made up of clusters equal to one less than the minimum. After each elimination, we regroup the clusters into new synteny blocks. Finally, we adjust the extents of each synteny block by removing overlapping sections from both synteny blocks so that every position in each genetic map is uniquely represented (Fig 3c).

## 254 Assessing the performance of the syntR algorithm

255

256 To evaluate the performance of this method and explore the effect of parameter choice on outcomes,  
257 we simulated genetic map comparisons with known inversion breakpoints and error rates in R. The  
258 genetic map comparisons were made by randomly placing 200 of markers at 100 positions along a 100  
259 cM chromosome in two maps, reversing marker positions within a defined inversion region in one  
260 map, and then repositioning markers based on simulated mapping noise using the following two error  
261 parameters: (1)  $ER_1$  is the standard deviation of a normal distribution used to pick the distances  
262 markers are pushed out of their correct positions (e.g., when  $ER_1$  is 1 cM 95% of markers will be within  
263 2 cM of their true position); (2)  $ER_2$  is the proportion of markers that are repositioned according to a  
264 uniform distribution (i.e., these markers can be moved to any position on the simulated chromosome).

265

266 We initially ran syntR using fixed syntR parameters ( $CR_{max} = 2$  and  $NN_{dist} = 10$ ) on multiple simulated  
267 maps, which were made using variable parameters (inversion size: 2.5-50 cM,  $ER_1$ : 0-2.0 cM, and  $ER_2$ :  
268 0-20%), and counted the number of times the known breakpoints were identified within 1 cM (Fig S3).  
269 As expected, we find that rearrangement size affects the false negative rate (i.e., failing to detect  
270 known breakpoints), such that smaller inversions are more likely to be missed (Fig S3c), but does not  
271 affect the false positive rate (i.e., detecting breakpoints where there are none). We also find that  
272 increasing both types of error in the genetic maps tends to increase both the false positive and false  
273 negative rates, although  $ER_1$  has a much stronger effect on the false positive rate than any other  
274 combination (Fig S3a,b).

275

276 Using the same simulation methods as above but now varying the syntR parameter  $CR_{max}$ , we find that  
277 small values of  $CR_{max}$  yield high false positive rates while large values yield high false negative rates (Fig  
278 S4a). In addition, the  $ER_1$  parameter has a strong effect on the relationship between  $CR_{max}$  and the false  
279 positive rate. Higher values of  $CR_{max}$  are needed to reduce the false positive rate when  $ER_1$  is also high  
280 (Fig S4b). This means that picking an appropriate  $CR_{max}$  value is key to the accuracy of this method.  
281 Although  $NN_{dist}$  has a much weaker effect on outcomes than  $CR_{max}$ , it is useful to consider both  
282 parameter values carefully.

283

284 When the syntR heuristic algorithm is performing well, the final synteny blocks should represent all  
285 positions in the two genetic maps being compared (Chen et al. 2009). Based on this characteristic, we  
286 developed a method to choose optimal syntR tuning parameters ( $CR_{max}$  and  $NN_{dist}$ ) that maximize the  
287 representation of the genetic maps and markers in synteny blocks. In this method a user: (1) runs syntR  
288 with a range of parameter combinations; (2) saves summary statistics about the genetic distance of  
289 each map represented in the synteny blocks and the number of markers retained for each run; and (3)  
290 finds the parameter combination that maximizes a composite statistic that equally weights these three  
291 measures. In cases where there are multiple local maxima, we suggest choosing the local maximum  
292 with the smallest value of  $CR_{max}$  to reduce the number of potential false positives.

293

294 The “maximize representation” method for choosing syntR parameters has several benefits. First, it  
295 does not rely on any additional information (e.g., error rate estimates from the genetic maps  
296 compared). Second, when we use this method to choose the best parameters for simulated genetic  
297 maps, we find that these parameter values also minimize false positive and false negative rates (Fig  
298 S5). Third, when we simulate biologically realistic genetic map comparisons, the absolute value of false  
299 positives and false negatives are small. For example, when comparing two genetic maps in which ~95%  
300 of markers are within 1 cM of their true position ( $ER_1 = 0.5$ ) and 5% of markers are randomly permuted  
301 ( $ER_2 = 0.05$ ), nonexistent breakpoints will be identified 0.1 times and a breakpoint of a 20 cM inversion  
302 will be missed 0.04 times. These low error rates also highlight the overall robustness and accuracy of  
303 the syntR algorithm.

304

305 In addition to performing simulations, we compared the synteny blocks identified by syntR to those  
306 identified by other means in a previously published comparison of *H. niveus ssp. tephrodes* and *H.*  
307 *argophyllus* maps to *H. annuus* (Barb et al. 2014). To do this, we formatted the original datasets for  
308 input into syntR and used the “maximize representation” method to determine the optimal parameter  
309 values for the two comparisons (*H. niveus vs. H. annuus*:  $CR_{max} = 1.5$ ,  $NN_{dist} = 30$ ; *H. argophyllus vs. H.*  
310 *annuus*:  $CR_{max} = 2$ ,  $NN_{dist} = 20$ ). We found that syntR was in strong agreement with previous work (Fig  
311 S6), recovering all the same translocations and most of the same inversions as the Barb et al. (2014)

312 maps. Most of the cases of mismatches were very small or weakly supported inversions in the Barb et  
313 al. (2014) maps that syntR did not identify.

314

## 315 Finding synteny blocks

316

317 We used syntR to identify synteny blocks between our newly generated genetic maps and an ultra-  
318 high-density map of *H. annuus* that was used to build the sunflower genome that we use as a reference  
319 (Badouin et al. 2017). This allowed us to easily convert between physical position in the *H. annuus*  
320 reference and position in the *H. annuus* genetic map. Using this property, we further compared two  
321 previously published genetic maps for the closely related sunflower species, *H. niveus* ssp. *tephrodes*  
322 and *H. argophyllus* (Barb et al. 2014), to the same *H. annuus* map. We aligned marker sequences from  
323 the published maps to the *H. annuus* reference using bwa and converted well-aligned markers (MQ >  
324 40) to their positions in the *H. annuus* genetic map.

325

326 Initially, we ran syntR using parameters identified through the “maximize representation” method for  
327 each map comparison separately (Table S1). However, varying CR<sub>max</sub> revealed rearrangements that  
328 were shared between the maps (Fig S7). Therefore, we ran syntR again using a range of CR<sub>max</sub> values  
329 that included the best fit for each comparison (1.0 - 3.5 in 0.5 increments) and extracted a curated set  
330 of synteny blocks from the output. A synteny block was retained if it fulfilled any of the following  
331 criteria (in decreasing order of importance): (1) it was found in another species, (2) it was identified in  
332 the majority of syntR runs for a single species, (3) it maximized the genetic distance represented by  
333 synteny blocks. We present this curated set of synteny blocks below, but our results are unchanged if  
334 we use the individually-fit synteny blocks.

335

336 We named the chromosomes in our genetic maps based on their synteny with the standard order and  
337 orientation of *H. annuus* chromosomes (Tang et al. 2002, Bowers et al. 2012) following Barb et al.  
338 (2014) but with shortened prefixes (A = *H. annuus*, R = *H. argophyllus*, N = *H. niveus* ssp. *tephrodes*, P =

339 *H. petiolaris* ssp. *petiolaris*, F = *H. petiolaris* ssp. *fallax*). For example, an *H. petiolaris* ssp. *fallax*  
340 chromosome made up of regions that are syntenic with *H. annuus* chromosomes 4 and 7 is called F4-7.  
341

## 342 Karyotype reconstruction and analysis

343  
344 We used our inferred synteny blocks and the software MGR v 2.01 (Bourque and Pevzner 2002) to infer  
345 ancestral karyotypes for our five *Helianthus* taxa and to determine the number of chromosomal  
346 rearrangements that occurred along each branch of the species tree. To run the MGR analysis, we  
347 needed the order and orientations of synteny blocks in all five maps. However, individual synteny  
348 blocks were often missing from one or more of our final maps. We approached this problem in two  
349 ways. First, we inferred the likely position of missing synteny blocks based on the location of markers  
350 that were too sparse to be grouped by syntR and matched the location of synteny blocks in other  
351 maps. In the second case, we dropped any synteny blocks that were not universally represented.  
352 Because we already had two sets of synteny blocks for each map (curated and individually optimized),  
353 we ran the MGR analyses using three different sets of synteny blocks: (set 1) curated and inferred, (set  
354 2) curated and present in all five maps, (set 3) individually optimized and present in all five maps.  
355

## 356 Data availability

357  
358 The R program, syntR, is available on GitHub: <https://github.com/ksamuk/syntR>. The sequences used  
359 to generate genetic maps are available on the SRA: <http://www.ncbi.nlm.nih.gov/bioproject/598366>.  
360 All other data and scripts are available on dryad: <https://doi.org/10.5061/dryad.7sqv9s4pc>.

## 361 Results

### 362 Genetic maps

363

364 Both *H. petiolaris* genetic maps are made up of the expected 17 chromosomes and have very high  
365 marker density (Fig 4, Fig S8). Only 6% of the *H. petiolaris* ssp. *petiolaris* map and 10% of the *H.*  
366 *petiolaris* ssp. *fallax* map fails to have a marker within 2 cM (Fig S9). Overall, both maps are somewhat  
367 longer than the *H. petiolaris* map reported by Burke et al. (2004). Although this could represent real  
368 variation between genotypes, it could also be the result of spurious crossovers that are inferred based  
369 on genotyping errors. Because genotyping errors are proportional to the number of markers, maps  
370 with high marker densities are more likely to be inflated. Indeed, building maps with variants that were  
371 thinned to 1 per 150 bp using vcftools version 0.1.13 (Danecek et al. 2011) yields collinear maps that  
372 are closer to the expected lengths (Table S2, Fig S10). We present subsequent results based on the full  
373 maps to improve our resolution for detecting small rearrangements.

374

375 Despite the general expansion of our maps, we find that chromosomes 2 and 4 in the *H. petiolaris* ssp.  
376 *fallax* map (F2 and F4) are unexpectedly short (Fig 4). When we look at the distribution of markers for  
377 this map relative to the *H. annuus* reference, we find very few variable sites in the distal half of these  
378 chromosomes (Fig S11). That is, this individual was homozygous along vast stretches of F2 and F4.  
379 These runs of homozygosity could be explained by recent common ancestry (i.e., inbreeding) or a lack  
380 of variation in the population (e.g, because of background selection or a recent selective sweep).  
381 Regardless, the lack of variable sites within the *H. petiolaris* ssp. *fallax* individual used for crosses  
382 explains the shortness of F2 and F4. Notably, we find the same pattern on the distal half of *H. annuus*  
383 chromosome 7 and find that this region is also not represented in the *H. petiolaris* ssp. *fallax* map.



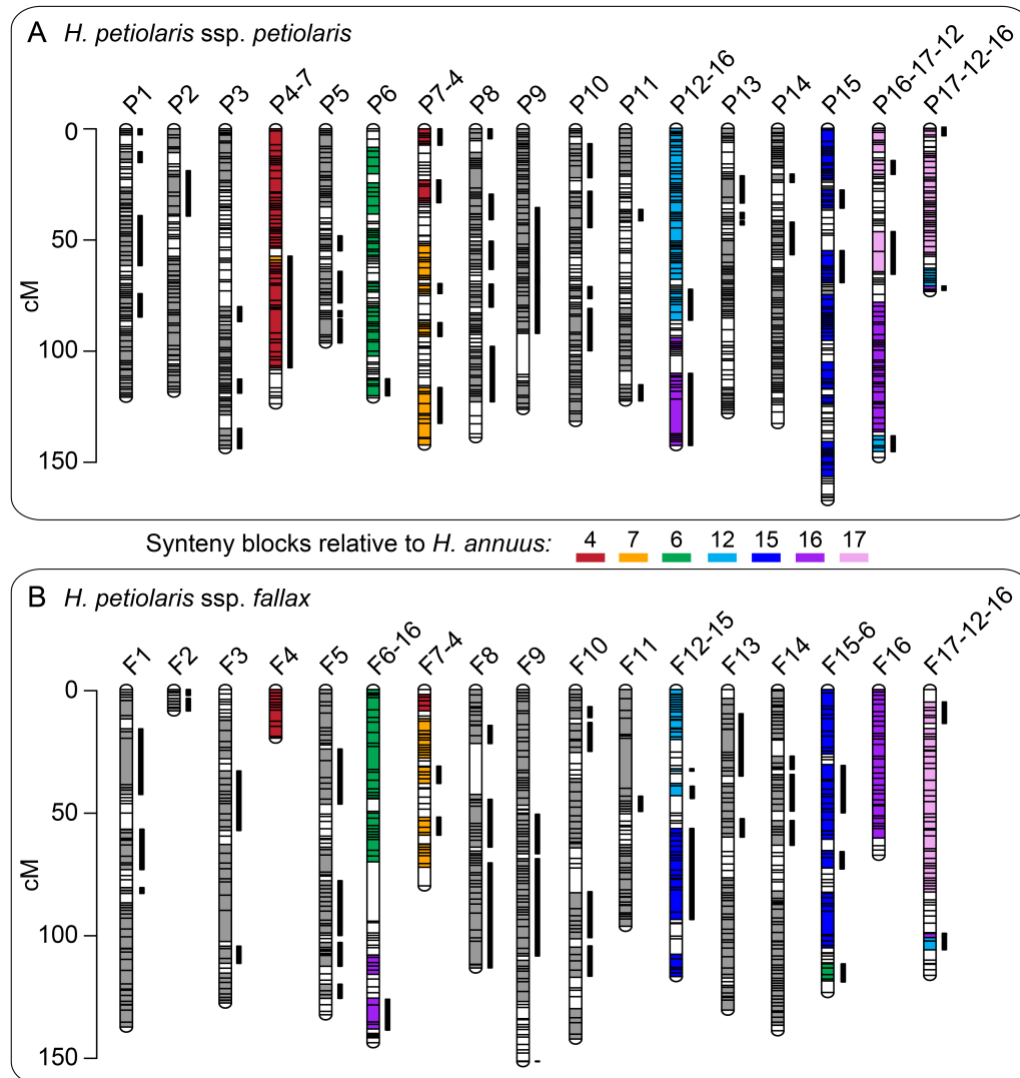

384

385 Figure 4 – *Helianthus petiolaris* genetic maps showing blocks of synteny with *H. annuus*. Each horizontal bar  
386 represents a genetic marker. The thick vertical bars next to chromosomes represent syntenic blocks that are  
387 inverted relative to the *H. annuus* genetic map. Where there are no translocations between *H. petiolaris* and *H.*  
388 *annuus* chromosomes (e.g., all syntenic blocks in P1 and F1 are syntenic with A1), the syntenic blocks are shown  
389 in grey. Where there are translocations, the syntenic blocks are color-coded based on their synteny with *H.*  
390 *annuus* chromosomes. Regions that are not assigned to a syntenic block remain white. The syntenic blocks  
391 plotted are those curated based on multiple runs of syntR using different parameters. Please see Fig S12 for a  
392 labeled version. This figure was made with LinkageMapView (Ouellette et al. 2017).

## 393 Synteny blocks

394

395 Using syntR, we recovered 97 genetic regions that are syntenic between the *H. petiolaris* ssp. *petiolaris*  
396 and *H. annuus* and 79 genetic regions that are syntenic between the *H. petiolaris* ssp. *fallax* and *H.*  
397 *annuus* (Fig 4). We also recovered synteny blocks for the *H. niveus* ssp. *tephrodes* and *H. argophyllus*  
398 comparisons that are similar to those found previously (Fig S13). In all four comparisons, syntR  
399 successfully identified synteny blocks that cover large proportions (63%-90%) of each genetic map even  
400 in the face of a very high proportion of markers that map to a different chromosome than their  
401 neighbors (Table 1). These “rogue markers” could be the result of very small translocations, poorly  
402 mapped markers, or extensive paralogy. Over and above the prevalence of rogue markers, the  
403 karyotypes we recovered are substantially rearranged. Only between 32% and 45% of synteny blocks  
404 for each map are collinear with the *H. annuus* genetic map in direct comparisons (Table 1).

405

406 Table 1 – Properties of the synteny blocks found using a syntR analysis between genetic maps of *H. annuus* and  
407 four other *Helianthus* taxa. The proportion of rogue markers is based only on the chromosomes without  
408 translocations in any map (i.e., chromosomes 1-3, 5, 8-10, 11, and 14). For those chromosomes, the majority of  
409 marker mapped to a single *H. annuus* chromosome. The other markers are considered rogue.

| Genetic map                                 | N synteny blocks | Rogue markers | Map coverage | <i>H. annuus</i> coverage | Collinear | Inverted | Translocated |
|---------------------------------------------|------------------|---------------|--------------|---------------------------|-----------|----------|--------------|
| <i>H. petiolaris</i> ssp. <i>petiolaris</i> | 97               | 19%           | 80%          | 74%                       | 39%       | 36%      | 26%          |
| <i>H. petiolaris</i> ssp. <i>fallax</i>     | 79               | 17%           | 63%          | 65%                       | 32%       | 34%      | 34%          |
| <i>H. niveus</i> ssp. <i>tephrodes</i>      | 43               | 26%           | 78%          | 75%                       | 40%       | 21%      | 39%          |
| <i>H. argophyllus</i>                       | 31               | 20%           | 90%          | 82%                       | 45%       | 16%      | 39%          |

410

## 411 Karyotype reconstruction and chromosomal rearrangement

412

413 Because nested and shared rearrangements can obscure patterns of chromosome evolution, we use  
414 the MGR analyses to predict the most likely sequence of rearrangements in a phylogenetic context  
415 before quantifying the rearrangement rate. These MGR analyses identified similar patterns of  
416 chromosome evolution regardless of the exact set of synteny blocks that we used (Table S5). Multiple

417 taxa share many rearrangements, and the similarity of karyotypes matches known phylogenetic  
418 relationships. Moreover, MGR analyses run without a guide tree inferred the known species tree, and  
419 MGR analyses run with all other topologies identified an inflated number of chromosomal  
420 rearrangements.  
421

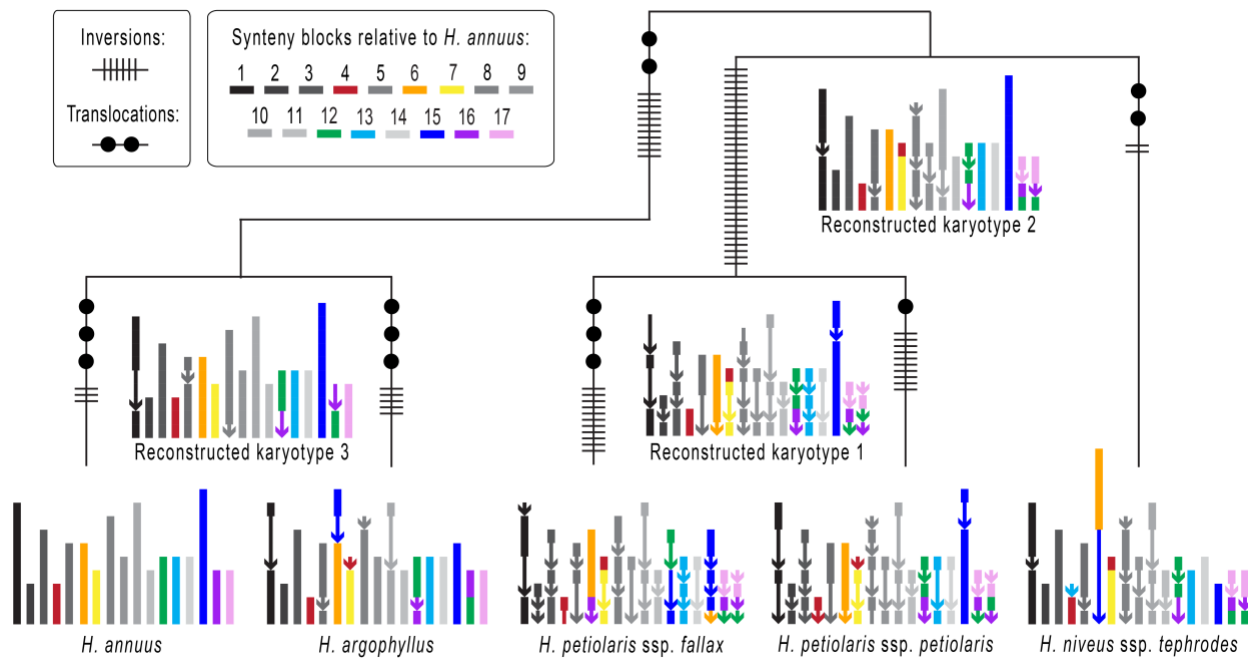

422  
423 Figure 5 – Diagram showing the karyotypes of 5 *Helianthus* taxa as well as reconstructed ancestral karyotypes  
424 and the locations of chromosomal rearrangements. The karyotypes were built using synteny block set 1, which  
425 were curated based on multiple syntR runs and inferred when missing. Each synteny block is represented using a  
426 line segment that is color-coded based on its position in the *H. annuus* genome (see Fig S14 for a labeled  
427 version). Chromosomes without translocations in any map are plotted in grey, and synteny blocks that are  
428 inverted relative to *H. annuus* are plotted using arrows. Also, note that along some branches the same pair of  
429 chromosomes is involved in multiple translocations.

430  
431 Using the most complete set of synteny blocks (set 1), we find that 88 chromosomal rearrangements  
432 occurred across the phylogeny (Fig 5). Then, using the most current divergence time estimates for this  
433 group (Todesco et al. 2019) and conservatively assuming that *H. niveus* ssp. *tephrodes* diverged at the  
434 earliest possible point, we estimate that 7.9 (7.8-8) rearrangements occurred per million years in this  
435 clade (Tables S3-S5). To further explore the potential range of rearrangement rates, we considered

436 other estimates of divergence times in sunflower (Sambatti et al. 2012, Mason 2018) and the other  
437 sets of synteny blocks. Overall, the lowest rate we identified was 2.6 rearrangements per million years,  
438 while the highest rate was indeterminable because some minimum divergence time estimates for the  
439 group include 0 (Tables S3-S5).

440  
441 The 88 rearrangements include 74 inversions and 14 translocations that are quite evenly distributed  
442 across the phylogeny. However, the excess inversions indicate that it is unlikely that the rate of  
443 inversions is equal to the rate of translocation (binomial test,  $5.1 \times 10^{-11}$ ). Furthermore, we find that only  
444 8 of the 17 chromosomes are involved in the 14 translocations we identified. If translocations were  
445 equally likely for all chromosomes, this asymmetry is very unlikely to have happened by chance (the  
446 probability of sampling  $\leq 8$  chromosomes in 14 translocations is  $8.0 \times 10^{-8}$ , Fig S15), suggesting that  
447 some chromosomes are more likely to be involved in translocations than other. In line with this  
448 observation, we see that some chromosome segments are repeatedly translocated. For example, A4  
449 and A7 are involved in several exchanges, and part of A6 has a different position in almost every map  
450 (Fig 5).

## 451 Discussion

452 Large-scale chromosomal changes may be key contributors to the process of adaptation and  
453 speciation, yet we still have a poor understanding of rates of chromosomal rearrangement and the  
454 evolutionary forces underlying those rates. Here, we devised a novel, systematic method for  
455 comparing any pair of genetic maps, and performed a comprehensive analysis of the evolution of  
456 chromosomal rearrangements in a clade of sunflowers. We created two new genetic maps for  
457 *Helianthus* species and used our new method to identify a wide range of karyotypic variation in our  
458 new maps, as well as previously published maps. Consistent with previous studies, we discovered a  
459 high rate of chromosomal evolution in the annual sunflowers. Further, we found that inversions are  
460 more common than translocations and that certain chromosomes are more likely to be translocated.  
461 Below, we discuss the evolutionary and methodological implications of this work and suggest some  
462 next steps in understanding the dynamic process of chromosomal rearrangement.

### 463 Identifying rearrangements

464  
465 Studying the evolution of chromosomal rearrangements requires dense genetic maps and systematic  
466 methods to analyze and compare these maps between species. Our new software, syntR, provides an  
467 end-to-end solution for systematic and repeatable identification of synteny blocks in pairs of genetic  
468 maps with any marker density. Our tests on real and simulated data find that syntR recovers  
469 chromosomal rearrangements identified previous by both manual comparisons and cytological study,  
470 suggesting that syntR is providing an accurate view of karyotypic differences between species.

471  
472 Overall, we believe syntR will be a valuable tool for the systematic study of chromosomal  
473 rearrangements in any species. The only data syntR needs to identify synteny blocks is relative marker  
474 positions in two genetic maps. This fact is significant because, although the number of species with  
475 whole genome sequence and methods to detect synteny blocks from those sequences are rapidly  
476 accumulating, such as Mauve (Darling et al. 2004), Cinteny (Sinha and Meller 2007), syMAP (Soderlund  
477 et al. 2011), SynChro (Drillion et al. 2014) and SyRI (Goel et al. 2019), it is still uncommon to have

478 multiple closely related whole genome sequences that are of sufficient quality to compare for  
479 karyotype differences. At the same time, the proliferation of reduced representation genome  
480 sequencing methods means that it is easy to generate many genetic markers for non-model species  
481 and produce very dense genetic maps. Furthermore, syntR allows comparisons to include older genetic  
482 map data that would otherwise go unused. The simplicity of the syntR algorithm will facilitate rapid  
483 karyotype mapping in a wide range of taxa.

484

485 We also believe that syntR provides a baseline for the development of further computational and  
486 statistical methods for the study of chromosomal rearrangements. One fruitful direction would be to  
487 integrate the syntR algorithm for synteny block detection directly into the genetic map building  
488 process (much like GOOGA, Flagel et al. 2019). Another key extension would be to allow syntR to  
489 compare multiple genetic maps simultaneously to detect synteny blocks in a group of species (e.g., by  
490 leveraging information across species). Finally, formal statistical methods for evaluating the model fit  
491 and the uncertainty involved with any set of synteny blocks would be a major (albeit challenging)  
492 improvement to all existing methods, including syntR.

### 493 The similarity of *H. petiolaris* maps to previous studies

494

495 Compared with previous work, we found more inversions and fewer translocations between *H.*  
496 *petiolaris* subspecies and *H. annuus* (Rieseberg et al. 1995, Burke et al. 2004). This is probably due to a  
497 combination of factors. First, there appears to be karyotypic variation within some *Helianthus* species  
498 (Heiser 1948, Heiser 1961, Chandler et al. 1986). Second, the maps presented here are made up of  
499 more markers and individuals, which allowed us to identify small inversions that were previously  
500 undetected as well as to eliminate false linkages that can be problematic in small mapping populations.  
501 Lastly, we required more evidence to call rearrangements. Although we recovered some of the  
502 translocations supported by multiple markers in Rieseberg et al. (1995) and Burke et al. (2004), we did  
503 not recover any of the translocations supported by only a single sequence-based marker. Given the  
504 high proportion of “rogue markers” in our maps, it is likely that some of the putative translocations  
505 recovered in those earlier comparisons are the result of the same phenomenon.

506

507 On the other hand, we found that rearrangements between our *H. petiolaris* maps match the  
508 translocations predicted from cytological studies quite well. Heiser (1961) predicted that *H. petiolaris*  
509 *ssp. petiolaris* and *H. petiolaris ssp. fallax* karyotypes would have three chromosomes involved in two  
510 translocations that form a ring during pairing at meiosis, as well as the possibility of a second  
511 independent rearrangement. This exact configuration is likely to occur at meiosis in hybrids between  
512 the *H. petiolaris* subspecies maps we present here (Fig S16). Also, the most noteworthy chromosome  
513 configuration in cytological studies of *H. annuus-H. petiolaris* hybrids (Heiser 1947, Whelan 1979,  
514 Ferriera 1980, Chandler et al. 1986) was a hexavalent (a six-chromosome structure) plus a quadrivalent  
515 (a four-chromosome structure). Again, this is the configuration that we would expect in a hybrid  
516 between *H. annuus* and the *H. petiolaris ssp. petiolaris* individual mapped here. Furthermore, the  
517 complicated arrangement and relatively small size of A12, A16 and A17 synteny blocks in *H. petiolaris*  
518 might explain why cytological configurations in *H. annuus-H. petiolaris* hybrids are so variable.  
519 Interestingly, the rearrangements identified between *H. argophyllus* and *H. annuus* karyotypes here  
520 and in Barb et al. (2014) also match the cytological studies better than an earlier comparison of sparse  
521 genetic maps (Heesacker et al. 2009). It seems that, in systems with the potential for high proportions  
522 of rogue markers, many markers are needed to identify chromosomal rearrangements reliably.

523

## 524 Total rearrangement rates

525

526 Our data suggest that annual sunflowers experience approximately 7.9 chromosomal rearrangements  
527 per million years. This rate overlaps with recent estimates for this group (7.4-10.3, Barb et al. 2014)  
528 and is even higher than the estimate that highlighted sunflower as a group with exceptionally fast  
529 chromosomal evolution (5.5-7.3, Burke et al. 2004). However, since Burke et al. (2004), chromosomal  
530 rearrangements have been tracked in many additional groups, including mammals (Ferguson-Smith  
531 and Trifonov 2007, Martinez et al. 2016, da Silva et al. 2019), fish (Molina et al. 2014, Ayres-Alves et al.  
532 2017), insects (Rueppell et al. 2016, Corbett-Detig et al. 2019), fungi (Sun et al. 2017) and plants  
533 (Yogeeswaran et al. 2005, Schranz et al. 2006, Huang et al. 2009, Vogel et al. 2010, Latta et al. 2019). Of

534 these analyses, relatively few have systematically studied karyotypes evolution across multiple species  
535 and estimated total rearrangement rates. Of those that do, most studies report less than 7.9  
536 chromosomal rearrangements per million years, for example, in *Solanum* (0.36-1.44, Wu and Tanksley  
537 2010), *Drosophila* (0.44-2.74, Bhutkar et al. 2008) and mammals (0.05-2.76, Murphy et al. 2005). But  
538 there are exceptions, such as a comparison of genome sequences that revealed up to 35.7  
539 rearrangements per million years in some grass lineages (Dvorak et al. 2018).

540

541 At the same time, we are likely underestimating rearrangement rates here for two reasons. First, we  
542 used conservative thresholds for calling rearrangements. For example, some proportion of the rogue  
543 markers that we identified could be the result of very small but real chromosomal rearrangements.  
544 Second, our ability to resolve very small synteny blocks and breakpoints between synteny blocks  
545 depends on marker density. Until we have full genome sequences to compare (like for the grass  
546 lineages), we could be failing to detect very small rearrangements and falsely inferring that  
547 independent rearrangements are shared. However, regardless of just how much we are  
548 underestimating the rate, sunflower chromosomes are evolving quickly. This high rate of chromosomal  
549 evolution could be a consequence of a higher rate of chromosomal mutation, a decreased chance that  
550 chromosomal polymorphisms are lost, or both processes.

551

## 552 Type of rearrangements

553

554 We found that inversions and interchromosomal translocations dominate chromosomal evolution in  
555 *Helianthus*. This pattern is common in angiosperm lineages (Weiss-Schneeweiss and Schneeweiss 2012)  
556 and fits with the consistent chromosome counts across annual sunflowers ( $2n = 34$ , Chandler et al.  
557 1986). In addition, we found more inversions than translocations, which has previously been seen in  
558 both plant (Wu and Tanksley 2010, Amores et al. 2014) and animal systems (Rueppell et al. 2016) and  
559 echoes general reports that intrachromosomal rearrangements are more common than  
560 interchromosomal rearrangements (Pevzner and Tesler 2003). These consistent rate differences are  
561 notable because, although both rearrangement types depend on double strand breaks, two of the



562 major consequences of chromosomal rearrangements, underdominance (i.e., rearrangement  
563 heterozygotes are less fit than either homozygote) and recombination modification, might be more  
564 common for some types of rearrangements.

565

566 Translocations have a more predictable effect on hybrid fertility, while inversions consistently reduce  
567 recombination. Reciprocal translocation heterozygotes can affect fertility because missegregation  
568 during meiosis can cause half of the gametes to be unbalanced and thus inviable (White 1973, King  
569 1993). Although inversion heterozygotes can also produce unbalanced gametes, whether that happens  
570 is dependent on the size of the inversion and whether disrupted pairing during meiosis inhibits  
571 crossovers (Searle 1993). When inversions are small or have suppressed crossing over, they will not be  
572 strongly underdominant. On the other hand, inversions often exhibit reduced recombination either  
573 because recombination is suppressed through disrupted pairing (Searle 1993) or ineffective through  
574 the production of inviable gametes (Rieseberg 2001). While interactions between reduced  
575 recombination and adaptation with gene flow have been extensively examined in the case of  
576 inversions (Kirkpatrick and Barton 2006, Hoffman and Rieseberg 2008, Yeaman and Whitlock 2011,  
577 Yeaman 2013), it is not clear whether the same pattern will be common for translocations (but see  
578 Fishman et al. 2013, Stathos and Fishman 2014 for one example). Translocations bring together  
579 previously unlinked alleles and mispairing at translocation breakpoints could suppress crossing over,  
580 but recombination inside reciprocal translocations will not necessarily produce inviable gametes and  
581 thus reduce effective recombination.

582

583 Although any selective force could be responsible for the evolution of any chromosomal  
584 rearrangement, potential differences in the relative magnitude of underdominance versus  
585 recombination suppression may contribute to the evolution of sunflower chromosomes. While many  
586 chromosomal rearrangements in sunflowers appear to be strongly underdominant (Chandler 1986, Lai  
587 et al. 2005), inversions typically are not (L. Rieseberg, unpublished). If translocations tend to be more  
588 underdominant than inversions, they would be less likely to evolve through drift and more likely to  
589 cause reproductive isolation directly. This could explain why translocations are less common than  
590 inversions and why pollen viability is accurately predicted by the number of translocations inferred

591 from cytological studies (Chandler et al. 1986). At the same time, recent genomic analyses have  
592 identified several extensive regions of very low recombination caused by large inversions segregating  
593 in natural sunflower populations (Todesco et al. 2019, Huang et al. 2019). Mutations that segregate for  
594 extended periods are unlikely to be strongly underdominant, and these inversions are associated with  
595 multiple adaptive alleles (Todesco et al. 2019), which is consistent with a role for selection in their  
596 origin or maintenance.

597

## 598 Non-random chromosomal rearrangement

599

600 We also found that some sunflower chromosomes are involved in more translocations than others.  
601 This pattern has been observed in wheat (Badaeva et al. 2007) and breakpoint reuse is a common  
602 phenomenon in comparative studies of karyotypes (Pevzner and Tesler 2003, Bailey et al. 2004,  
603 Murphy et al. 2005, Larkin et al. 2009). Many studies support the idea that chromosomal regions with  
604 greater sequence similarity are more likely to recombine and thus potentially generate novel  
605 chromosomal arrangements. Some of the clearest examples of this come from the polyploidy  
606 literature, where chromosomes with ancestral homology are more likely to recombine (Nicolas et al.  
607 2007, Marone et al. 2012, Mason et al. 2014, Tennessen et al. 2014, Nguempjop et al. 2016). However,  
608 centromeres and other repetitive regions can also affect the rate of mutations that cause  
609 chromosomal rearrangements (Hardison et al. 2003, Murphy et al. 2005, Raskina et al. 2008, Molnár et  
610 al. 2010, Vitte et al. 2014, Ayers-Alves et al. 2017, Li et al. 2017, Corbett-Detig et al. 2019). Given that  
611 sunflowers have several genome duplications and a burst of transposable element activity in their  
612 evolutionary history (Barker et al. 2008, Kawakami et al. 2011, Staton et al. 2012, Barker et al. 2016,  
613 Badouin et al. 2017) it is plausible that ancestral homology or repeat content could be associated with  
614 translocation propensity.

615

616 Of the above possibilities, an association between repeated translocations and centromeres would be  
617 particularly compelling. Beyond the repeat content of centromeres explaining non-random mutation  
618 (Kawabe et al. 2006, Sun et al. 2017, but see Lin et al. 2018, Okita et al. 2019), the position and size of

619 centromeres on chromosomes is known to affect meiotic drive and thus the repositioning of  
620 centromeres through rearrangement could cause non-random fixation of translocations (Kaszás et al.  
621 1998, Chmátal et al. 2014, Zanders et al. 2014). The relative placement of centromeres has been  
622 associated with chromosome evolution in *Brassica* (Schranz et al. 2006) and wheat (Badaeva et al.  
623 2007), and associations between meiotic drive and chromosome evolution have been found in several  
624 animal taxa (Bidau and Martí 2004, Palestis et al. 2004, Molina et al. 2014, Blackmon et al. 2019). In  
625 sunflower, we see some hints that centromeric repeats might be associated with repeated  
626 translocation. Using the locations of the centromere-specific retrotransposon sequence, HaCEN-LINE  
627 (Nagaki et al. 2015), to roughly identify the locations of centromeres in our reference, we find that  
628 some rearrangement breakpoints, for example, the section of A16 with a different position in each  
629 map, are close to putative centromeres (Fig S17-S20). Although a more thorough analysis of  
630 centromeric repeat locations and their association with rearrangement breakpoints is required to draw  
631 firm conclusions about the importance of centromeres to chromosomal evolution in sunflower, the  
632 development of reference sequences for wild sunflower species is underway, which will allow those  
633 and other associations to be confirmed. Further, it is time to directly test for meiotic drive in this  
634 system by examining the transmission of rearrangements that affect centromeres in gametes produced  
635 by plants that have heterozygous karyotypes.

636

## 637 Conclusion

638

639 Understanding the evolution of chromosomal rearrangements remains a key challenge in evolutionary  
640 genetics. By developing new software to systematically detect synteny blocks and building new genetic  
641 maps, we show that sunflowers exhibit rapid and non-random patterns of chromosomal evolution.  
642 These data generate specific and testable hypotheses about chromosomal evolution in sunflower. We  
643 believe that our work will spur additional studies of karyotypic evolution and diversity, and ultimately  
644 lead to a more comprehensive understanding of the interplay between chromosomal evolution and  
645 speciation.

## 646 Acknowledgments

647

648 We thank Jessica Barb for providing marker sequence data, Marcy Uyenoyama for help with our  
649 random walk analysis, Greg Baute for sharing hybrid seed, Chris Grassa for growing seedlings and  
650 sharing scripts, and both Marco Todesco and Nadia Chaidir for help in the lab. We also thank Jenn  
651 Coughlan, Andrew MacDonald, Brook Moyers, Mariano Alvarez, Dolph Schluter, Darren Irwin, Sally  
652 Otto, and three anonymous reviewers for thoughtful discussions and help with earlier drafts of this  
653 manuscript. This work was supported by an NSERC Postgraduate Scholarship awarded to KLO and an  
654 NSERC Discovery Grant awarded to LHR (327475).

655

## 656 Author contributions

657

658 KLO and LHR planned the study. KLO and KS designed and built the R package syntR. KLO made genetic  
659 maps, carried out data analysis, and drafted the manuscript. All authors read, edited, and approved the  
660 final manuscript.

## 661 References

662

663 Amores A., Catchen J., Nanda I., Warren W., Walter R. *et al.*, 2014 A RAD-tag genetic map for the  
664 platyfish (*Xiphophorus maculatus*) reveals mechanisms of karyotype evolution among teleost fish.  
665 *Genetics* **197**: 625–641.

666 Ayres-Alves T., Cardoso A. L., Nagamachi C. Y., Sousa L. M. de, Pieczarka J. C., Noronha R. C. R., 2017  
667 Karyotypic evolution and chromosomal organization of repetitive DNA sequences in species of  
668 *Panaque*, *Panaqolus*, and *Scobinancistrus* (Siluriformes and Loricariidae) from the Amazon Basin.  
669 *Zebrafish* **14**: 251–260.

670 Badaeva E. D., Dedkova O. S., Gay G., Pukhalskyi V. A., Zelenin A. V., Bernard S., Bernard M., 2007  
671 Chromosomal rearrangements in wheat: their types and distribution. *Génome* **50**: 907–926.

672

673

- 674 Badouin H., Gouzy J., Grassa C. J., Murat F., Staton S. E. *et al.*, 2017 The sunflower genome provides  
675 insights into oil metabolism, flowering and Asterid evolution. *Nature* **175**: 1823.
- 676 Bailey J. A., Baertsch R., Kent W., Haussler D., Eichler E. E., 2004 Hotspots of mammalian chromosomal  
677 evolution. *Genome Biology* **5**: R23–7.
- 678 Barb J. G., Bowers J. E., Renaut S., Rey J. I., Knapp S. J., et al., 2014 Chromosomal evolution and  
679 patterns of introgression in *Helianthus*. *Genetics* **197**: 969–979.
- 680 Barker M. S., Kane N. C., Matvienko M., Kozik A., Michelmore R. W., et al., 2008 Multiple  
681 paleopolyploidizations during the evolution of the Compositae reveal parallel patterns of duplicate  
682 gene retention after millions of years. *Molecular Biology and Evolution* **25**: 2445–2455.
- 683 Barker M. S., Li Z., Kidder T. I., Reardon C. R., Lai Z., Oliveira L. O., Scascitelli M., Rieseberg L. H., 2016  
684 Most Compositae (Asteraceae) are descendants of a paleohexaploid and all share a paleotetraploid  
685 ancestor with the Calyceraceae. *American Journal of Botany* **103**: 1203–1211.
- 686 Baute G. J., Owens G. L., Bock D. G., Rieseberg L. H., 2016 Genome-wide genotyping-by-sequencing  
687 data provide a high-resolution view of wild *Helianthus* diversity, genetic structure, and interspecies  
688 gene flow. *American Journal of Botany* **103**: 2170–2177.
- 689 Berdan E. L., Kozak G. M., Ming R., Rayburn A. L., Kiehart R., Fuller R. C., 2014 Insight into genomic  
690 changes accompanying divergence: genetic linkage maps and synteny of *Lucania goodei* and *L.*  
691 *parva* reveal a Robertsonian fusion. *G3: Genes | Genomes | Genetics* **4**: 1363–1372.
- 692 Bhutkar A., Schaeffer S. W., Russo S. M., Xu M., Smith T. F., Gelbart W. M., 2008 Chromosomal  
693 rearrangement inferred from comparisons of 12 *Drosophila* genomes. *Genetics* **179**: 1657–1680.
- 694 Bidau C. J., Martí D. A., 2004 B chromosomes and Robertsonian fusions of *Dichroplus pratensis*  
695 (Acrididae): Intraspecific support for the centromeric drive theory. *Cytogenet Genome Res* **106**:  
696 347–350.
- 697 Bilton T. P., Schofield M. R., Black M. A., Chagné D., Wilcox P. L., Dodds K. G., 2018 Accounting for  
698 errors in low coverage high-throughput sequencing data when constructing genetic maps using  
699 biparental outcrossed populations. *Genetics* **209**: 65–76.
- 700 Blackmon H., Justison J., Mayrose I., Goldberg E. E., 2019 Meiotic drive shapes rates of karyotype  
701 evolution in mammals. *Evolution* **73**: 511–523.
- 702 Bourque G., Pevzner P. A., 2002 Genome-scale evolution: reconstructing gene orders in the ancestral  
703 species. *Genome Research* **12**: 26–36.
- 704 Bowers J. E., Bachlava E., Brunick R. L., Rieseberg L. H., Knapp S. J., Burke J. M., 2012 Development of a  
705 10,000 locus genetic map of the sunflower genome based on multiple crosses. *G3* **2**: 721–729.
- 706 Broman K. W., Wu H., Sen S., Churchill G. A., 2003 R/qtl: QTL mapping in experimental crosses.

- 707        Bioinformatics **19**: 889–890.
- 708        Burke J. M., Lai Z., Salmaso M., Nakazato T., Tang S., Heesacker A., Knapp S. J., Rieseberg L. H., 2004  
709        Comparative mapping and rapid karyotypic evolution in the genus *Helianthus*. Genetics **167**: 449–  
710        457.
- 711        Chandler J. M., Jan C. C., Beard B. H., 1986 Chromosomal differentiation among the annual *Helianthus*  
712        species. Systematic Botany **11**: 354–371.
- 713        Chen Z., Fu B., Jiang M., Zhu B., 2009 On recovering syntenic blocks from comparative maps. J Comb  
714        Optim **18**: 307–318.
- 715        Chmátal L., Gabriel S. I., Mitsainas G. P., Martínez-Vargas J., Ventura J *et al.*, 2014 Centromere strength  
716        provides the cell biological basis for meiotic drive and karyotype evolution in mice. Current Biology  
717        **24**: 2295–2300.
- 718        Choi V., Zheng C., Zhu Q., Sankoff D., 2007 Algorithms for the extraction of synteny blocks from  
719        comparative maps. In: International Workshop on Algorithms in Bioinformatics, pp. 277–288.  
720        Springer, Berlin, Heidelberg.
- 721        Corbett-Detig R. B., Said I., Calzetta M., Genetti M., McBroome J., Maurer N. W., Petrarca V., Torre  
722        della A., Besansky N. J., 2019 Fine-mapping complex inversion breakpoints and investigating  
723        somatic pairing in the *Anopheles gambiae* species complex using proximity-ligation sequencing.  
724        Genetics **213**: 1495–1511.
- 725        da Silva W. O., Pieczarka J. C., da Costa M. J. R., Ferguson-Smith M. A., O’Brien P. C. M., Mendes-  
726        Oliveira A. C., Rossi R. V., Nagamachi C. Y., 2019 Chromosomal phylogeny and comparative  
727        chromosome painting among *Neacomys* species (Rodentia, Sigmodontinae) from eastern  
728        Amazonia. BMC Evolutionary Biology **19**: 1–13.
- 729        Danecek P., Auton A., Abecasis G., Albers C. A., Banks E. *et al.*, 1000 Genomes Project Analysis Group,  
730        2011 The variant call format and VCFtools. Bioinformatics **27**: 2156–2158.
- 731        Darling A. C. E., Mau B., Blattner F. R., Perna N. T., 2004 Mauve: multiple alignment of conserved  
732        genomic sequence with rearrangements. Genome Research **14**: 1394–1403.
- 733        DePristo M. A., Banks E., Poplin R., Garimella K. V., Maguire J. R. *et al.*, 2011 A framework for variation  
734        discovery and genotyping using next-generation DNA sequencing data. Nat Genet **43**: 491–501.
- 735        Doyle J., Doyle J., 1987 A rapid DNA isolation procedure for small quantities of fresh leaf tissue.  
736        Phytochem Bull **19**: 11–15.
- 737        Drillon G., Carbone A., Fischer G., 2014 SynChro: A fast and easy tool to reconstruct and visualize  
738        synteny blocks along eukaryotic chromosomes. PLoS ONE **9**: e92621–8.  
739

740

- 741 Dvorak J., Wang L., Zhu T., Jorgensen C. M., Deal K. R. *et al.*, 2018 Structural variation and rates of  
742 genome evolution in the grass family seen through comparison of sequences of genomes greatly  
743 differing in size. *Plant J* **95**: 487–503.
- 744 Ferguson-Smith M. A., Trifonov V., 2007 Mammalian karyotype evolution. *Nat Rev Genet* **8**: 950–962.
- 745 Ferriera J. V., 1980 Introgressive hybridization between *Helianthus annuus* L. and *Helianthus petiolaris*  
746 Nutt. *Mendeliana* **4**: 81–93.
- 747 Fishman L., Stathos A., Beardsley P. M., Williams C. F., Hill J. P., 2013 Chromosomal rearrangements  
748 and the genetics of reproductive barriers in *Mimulus* (monkey flowers). *Evolution* **67**: 2547–2560.
- 749 Flagel L. E., Blackman B. K., Fishman L., Monnahan P. J., Sweigart A., Kelly J. K., 2019 GOOGA: A  
750 platform to synthesize mapping experiments and identify genomic structural diversity (FA Feltus,  
751 Ed.). *PLoS Comput Biol* **15**: e1006949–25.
- 752 Goel M., Sun H., Jiao W.-B., Schneeberger K., 2019 SyRI: Finding genomic rearrangements and local  
753 sequence differences from whole- genome assemblies. *Genome Biology* **20**: 1–13.
- 754 Hackett C. A., Broadfoot L. B., 2003 Effects of genotyping errors, missing values and segregation  
755 distortion in molecular marker data on the construction of linkage maps. *Heredity* **90**: 33–38.
- 756 Hardison R. C., Roskin K. M., Yang S., Diekhans M., Kent W. J. *et al.*, 2003 Covariation in frequencies of  
757 substitution, deletion, transposition, and recombination during eutherian evolution. *Genome*  
758 *Research* **13**: 13–26.
- 759 Heesacker A. F., Bachlava E., Brunick R. L., Burke J. M., Rieseberg L. H., Knapp S. J., 2009 Karyotypic  
760 Evolution of the Common and Silverleaf Sunflower Genomes. *The Plant Genome* **2**: 233–14.
- 761 Heiser C. B. Jr, 1947 Hybridization between the sunflower species *Helianthus annuus* and *H. petiolaris*.  
762 *Evolution* **1**: 249–262.
- 763 Heiser C. B. Jr, 1948 Taxonomic and Cytological Notes on the Annual Species of *Helianthus*. *Bulletin of*  
764 *the Torrey Botanical Club* **75**: 512–515.
- 765 Heiser C. B. Jr, 1951 Hybridization in the annual sunflowers: *Helianthus annuus* x *H. argophyllus*. *The*  
766 *American Naturalist* **85**: 65–72.
- 767 Heiser C. B. Jr, 1961 Morphological and cytological variation in *Helianthus petiolaris* with notes on  
768 related species. *Evolution* **15**: 247–258.
- 769 Hoffmann A. A., Rieseberg L. H., 2008 Revisiting the impact of inversions in evolution: From population  
770 genetic markers to drivers of adaptive shifts and speciation? *Annu. Rev. Ecol. Evol. Syst.* **39**: 21–42.

- 771 Huang K., Andrew R. L., Owens G. L., Ostevik K. L., Rieseberg L. H., 2019 Multiple chromosomal  
772 inversions contribute to adaptive divergence of a dune sunflower ecotype. *bioRxiv*: 829622.
- 773 Huang S., Li R., Zhang Z., Li L., Gu X., et al., 2009 The genome of the cucumber, *Cucumis sativus* L. *Nat*  
774 *Genet* **41**: 1275–1281.
- 775 Huchra J. P., Geller M. J., 1982 Groups of galaxies. I-Nearby groups. *The Astrophysical Journal* **257**:  
776 423–437.
- 777 Kaszás E., Genetics J. B., 1998 Meiotic transmission rates correlate with physical features of rearranged  
778 centromeres in maize. *Genetics* **150**: 1683-1692.
- 779 Kawabe A., Hansson B., Hagenblad J., Forrest A., Charlesworth D., 2006 Centromere locations and  
780 associated chromosome rearrangements in *Arabidopsis lyrata* and *A. thaliana*. *Genetics* **173**:  
781 1613–1619.
- 782 Kawakami T., Dhakal P., Katterhenry A. N., Heatherington C. A., Ungerer M. C., 2011 Transposable  
783 element proliferation and genome expansion are rare in contemporary sunflower hybrid  
784 populations despite widespread transcriptional activity of LTR retrotransposons. *Genome Biol Evol*  
785 **3**: 156–167.
- 786 King M., 1987 Chromosomal rearrangements, speciation and the theoretical approach. *Heredity* **59**: 1–  
787 6.
- 788 King M., 1993 *Species Evolution*. Cambridge University Press.
- 789 Kirkpatrick M., Barton N., 2006 Chromosome inversions, local adaptation and speciation. *Genetics* **173**:  
790 419–434.
- 791 Lai Z., Nakazato T., Salmaso M., Burke J. M., Tang S. *et al.*, 2005 Extensive chromosomal repatterning  
792 and the evolution of sterility barriers in hybrid sunflower species. *Genetics* **171**: 291–303.
- 793 Larkin D. M., Pape G., Donthu R., Auvil L., Welge M., Lewin H. A., 2009 Breakpoint regions and  
794 homologous synteny blocks in chromosomes have different evolutionary histories. *Genome*  
795 *Research* **19**: 770–777.
- 796 Latta R. G., Bekele W. A., Wight C. P., Tinker N. A., 2019 Comparative linkage mapping of diploid,  
797 tetraploid, and hexaploid *Avena* species suggests extensive chromosome rearrangement in  
798 ancestral diploids. *Scientific Reports* **9**: 1–12.
- 799 Li H., 2013 Aligning sequence reads, clone sequences and assembly contigs with BWA-MEM. *arXiv*:  
800 13033997.
- 801 Li H., Durbin R., 2010 Fast and accurate long-read alignment with Burrows-Wheeler transform.  
802 *Bioinformatics* **26**: 589–595.



- 803 Li S.-F., Su T., Cheng G.-Q., Wang B.-X., Li X., Deng C.-L., Gao W.-J., 2017 Chromosome evolution in  
804 connection with repetitive sequences and epigenetics in plants. *Genes* **8**: 290–19.
- 805 Lin C.-Y., Shukla A., Grady J., Fink J., Dray E., Duijf P., 2018 Translocation breakpoints preferentially  
806 occur in euchromatin and acrocentric chromosomes. *Cancers* **10**: 13–19.
- 807 Mandel J. R., Nambeesan S., Bowers J. E., Marek L. F., Ebert D. *et al.*, 2013 Association mapping and the  
808 genomic consequences of selection in sunflower. *PLoS Genetics* **9**: e1003378.
- 809 Marone D., Laidò G., Gadaleta A., Colasuonno P., Ficco D. B. M., Giancaspro A., Giove S., Panio G.,  
810 Russo M. A., De Vita P., Cattivelli L., Papa R., Blanco A., Mastrangelo A. M., 2012 A high-density  
811 consensus map of A and B wheat genomes. *Theor Appl Genet* **125**: 1619–1638.
- 812 Martinez P. A., Jacobina U. P., Fernandes R. V., Brito C., Penone C., Amado T. F., Fonseca C. R., Bidau C.  
813 J., 2016 A comparative study on karyotypic diversification rate in mammals. *Heredity* **118**: 366–  
814 373.
- 815 Mason A. S., Nelson M. N., Takahira J., Cowling W. A., Alves G. M., Chaudhuri A., Chen N., Ragu M. E.,  
816 Dalton-Morgan J., Coriton O., Huteau V., Eber F., Chèvre A. M., Batley J., 2014 The fate of  
817 chromosomes and alleles in an allohexaploid *Brassica* population. *Genetics* **197**: 273–283.
- 818 Mason C. M., 2018 How old are sunflowers? A molecular clock analysis of key divergences in the origin  
819 and diversification of *Helianthus* (Asteraceae). *Int. J Plant Sci.* **179**: 182–191.
- 820 Matvienko M., Kozik A., Froenicke L., Lavelle D., Martineau B. *et al.*, 2013 Consequences of normalizing  
821 transcriptomic and genomic libraries of plant genomes using a duplex-specific nuclease and  
822 tetramethylammonium chloride. *PLoS ONE* **8**: e55913–17.
- 823 McKenna A., Hanna M., Banks E., Sivachenko A., Cibulskis K. *et al.*, 2010 The Genome Analysis Toolkit:  
824 A MapReduce framework for analyzing next-generation DNA sequencing data. *Genome Research*  
825 **20**: 1297–1303.
- 826 Molina W. F., Martinez P. A., Bertollo L. A. C., Bidau C. J., 2014 Evidence for meiotic drive as an  
827 explanation for karyotype changes in fishes. *Marine Genomics* **15**: 29–34.
- 828 Molnár I., Cifuentes M., Schneider A., Benavente E., Molnár-Láng M., 2010 Association between simple  
829 sequence repeat-rich chromosome regions and intergenomic translocation breakpoints in natural  
830 populations of allopolyploid wild wheats. *Annals of Botany* **107**: 65–76.
- 831 Murphy W. J., Larkin D. M., Everts-van der Wind A., Bourque G., Tesler G. *et al.*, 2005 Dynamics of  
832 mammalian chromosome evolution inferred from multispecies comparative maps. *Science* **309**:  
833 613–617.
- 834 Nagaki K., Tanaka K., Yamaji N., Kobayashi H., Murata M., 2015 Sunflower centromeres consist of a  
835 centromere-specific LINE and a chromosome-specific tandem repeat. *Front. Plant Sci.* **6**: 1-12.

- 836 Navarro A., Barton N. H., 2003 Chromosomal speciation and molecular divergence--accelerated  
837 evolution in rearranged chromosomes. *Science* **300**: 321–324.
- 838 Nguiepjop J. R., Tossim H.-A., Bell J. M., Rami J.-F., Sharma S., Courtois B., Mallikarjuna N., Sane D.,  
839 Fonceka D., 2016 Evidence of genomic exchanges between homeologous chromosomes in a cross  
840 of peanut with newly synthesized allotetraploid hybrids. *Front. Plant Sci.* **7**: 87–12.
- 841 Nicolas S. D., Mignon G. L., Eber F., Coriton O., Monod H., Clouet V., Huteau V., Lostanlen A., Delourme  
842 R., Chalhoub B., Ryder C. D., Chèvre A. M., Jenczewski E., 2007 Homeologous recombination plays a  
843 major role in chromosome rearrangements that occur during meiosis of *Brassica napus* haploids.  
844 *Genetics* **175**: 487–503.
- 845 Noor M. A., Grams K. L., Bertucci L. A., Reiland J., 2001 Chromosomal inversions and the reproductive  
846 isolation of species. *Proceedings of the National Academy of Sciences* **98**: 12084–12088.
- 847 Okita A. K., Zafar F., Su J., Weerasekara D., Kajitani T., Takahashi T. S., Kimura H., Murakami Y.,  
848 Masukata H., Nakagawa T., 2019 Heterochromatin suppresses gross chromosomal rearrangements  
849 at centromeres by repressing Tfs1/TFIIS-dependent transcription. *Communications Biology* **2**: 1–  
850 13.
- 851 Ostevik K. L., 2016 The ecology and genetics of adaptation and speciation in dune sunflowers.
- 852 Ouellette L. A., Reid R. W., Blanchard S. G., Brouwer C. R., 2017 LinkageMapView - Rendering High  
853 Resolution Linkage and QTL Maps. *Bioinformatics* **34**: 306-307.
- 854 Palestis B. G., Burt A., Jones R. N., Trivers R., 2004 B chromosomes are more frequent in mammals with  
855 acrocentric karyotypes: Support for the theory of centromeric drive. *Proc. Biol. Sci.* **271**: 1–3.
- 856 Pevzner P., Tesler G., 2003 Genome rearrangements in mammalian evolution: lessons from human and  
857 mouse genomes. *Genome Research* **13**: 37–45.
- 858 Poland J. A., Brown P. J., Sorrells M. E., Jannink J.-L., 2012 Development of high-density genetic maps  
859 for barley and wheat using a novel two-enzyme genotyping-by-sequencing approach. *PLoS ONE* **7**:  
860 e32253.
- 861 Quillet M. C., Madjidian N., Griveau Y., Serieys H., Tersac M., Lorieux M., Berville A., 1995 Mapping  
862 genetic factors controlling pollen viability in an interspecific cross in *Helianthus* sect. *Helianthus*.  
863 *Theor Appl Genet* **91**: 1195–1202.
- 864 Raduski A. R., Rieseberg L., Strasburg J., 2010 Effective population size, gene flow, and species status in  
865 a narrow endemic sunflower, *Helianthus neglectus*, compared to its widespread sister species, *H.*  
866 *petiolaris*. *IJMS* **11**: 492–506.
- 867 Raskina O., Barber J. C., Nevo E., Belyayev A., 2008 Repetitive DNA and chromosomal rearrangements:  
868 speciation-related events in plant genomes. *Cytogenet Genome Res* **120**: 351–357.  
869

- 870 Rieseberg L., 1991 Homoploid reticulate evolution in *Helianthus* (Asteraceae): evidence from ribosomal  
871 genes American Journal of Botany **78**: 1218-1237.
- 872 Rieseberg L. H., 2001 Chromosomal rearrangements and speciation. Trends in Ecology & Evolution **16**:  
873 351–358.
- 874 Rieseberg L. H., Linder C. R., Seiler G. J., 1995 Chromosomal and genic barriers to introgression in  
875 *Helianthus*. Genetics **141**: 1163–1171.
- 876 Rogers C. E., Thompson T. E., Seiler G. J., 1982 *Sunflowers species of the United States*. National  
877 Sunflower Association.
- 878 Rohland N., Reich D., 2012 Cost-effective, high-throughput DNA sequencing libraries for multiplexed  
879 target capture. Genome Research **22**: 939–946.
- 880 Rueppell O., Kuster R., Miller K., Fouks B., Rubio Correa S., Collazo J., Phaincharoen M., Tingek S.,  
881 Koeniger N., 2016 A new metazoan recombination rate record and consistently high recombination  
882 rates in the honey bee genus *Apis* accompanied by frequent inversions but not translocations.  
883 Genome Biol Evol **8**: 3653-3660.
- 884 Sambatti J. B. M., Strasburg J. L., Ortiz-Barrientos D., Baack E. J., Rieseberg L. H., 2012 Reconciling  
885 extremely strong barriers with high levels of gene exchange in annual sunflowers. Evolution **66**:  
886 1459–1473.
- 887 Schlautman B., Diaz-Garcia L., Covarrubias-Pazaran G., Schlautman N., Vorsa N. et al., 2017  
888 Comparative genetic mapping reveals synteny and collinearity between the American cranberry  
889 and diploid blueberry genomes. Molecular Breeding **38**: 1-19.
- 890 Schranz M. E., Mitchell-Olds T., Lysak M. A., 2006 The ABC's of comparative genomics in the  
891 Brassicaceae: Building blocks of crucifer genomes. Trends in Plant Science **11**: 535–542.
- 892 Searle J. B., 1993 Chromosomal hybrid zones in eutherian mammals. In: *Hybrid zones and the  
893 evolutionary process*, pp. 309–353.
- 894 Shagina I., Bogdanova E., Mamedov I., Lebedev Y., Lukyanov S., Shagin D., 2010 Normalization of  
895 genomic DNA using duplex-specific nuclease. Biotechniques **48**: 455–459.
- 896 Sinha A. U., Meller J., 2007 Cinteny: Flexible analysis and visualization of synteny and genome  
897 rearrangements in multiple organisms. BMC Bioinformatics **8**: 82–9.
- 898 Soderlund C., Bomhoff M., Nelson W. M., 2011 SyMAP v3.4: A turnkey synteny system with application  
899 to plant genomes. Nucleic Acids Research **39**: e68–e68.  
900
- 901 Stathos A., Fishman L., 2014 Chromosomal rearrangements directly cause underdominant F1 pollen  
902 sterility in *Mimulus lewisii*-*Mimulus cardinalis* hybrids. Evolution **68**: 3109–3119.

- 903 Staton S. E., Bakken B. H., Blackman B. K., Chapman M. A., Kane N. C. *et al.*, 2012 The sunflower  
904 (*Helianthus annuus* L.) genome reflects a recent history of biased accumulation of transposable  
905 elements. *The Plant Journal* **72**: 142–153.
- 906 Stephens J. D., Rogers W. L., Mason C. M., Donovan L. A., Malmberg R. L., 2015 Species tree estimation  
907 of diploid *Helianthus* (Asteraceae) using target enrichment. *American Journal of Botany* **102**: 910–  
908 920.
- 909 Strasburg J., Rieseberg L., 2008 Molecular demographic history of the annual sunflowers *Helianthus*  
910 *annuus* and *H. petiolaris*—Large effective population sizes and rates of long-term gene flow.  
911 *Evolution* **62**: 1936–1950.
- 912 Sun S., Yadav V., Billmyre R. B., Cuomo C. A., Nowrousian M., Wang L., Souciet J.-L., Boekhout T., Porcel  
913 B., Wincker P., Granek J. A., Sanyal K., Heitman J., 2017 Fungal genome and mating system  
914 transitions facilitated by chromosomal translocations involving intercentromeric recombination.  
915 *PLoS Biol* **15**: e2002527–31.
- 916 Tang S., Yu J. K., Slabaugh M. B., Shintani D. K., Knapp S. J., 2002 Simple sequence repeat map of the  
917 sunflower genome. *TAG Theoretical and Applied Genetics* **105**: 1124–1136.
- 918 Taylor J., Butler D., 2017 RPackage ASMap: Efficient Genetic Linkage Map Construction and Diagnosis.  
919 *J. Stat. Soft.* **79**: 1–29.
- 920 Tennessen J. A., Govindarajulu R., Ashman T.-L., Liston A., 2014 Evolutionary origins and dynamics of  
921 octoploid strawberry subgenomes revealed by dense targeted capture linkage maps. *Genome Biol*  
922 *Evol* **6**: 3295–3313.
- 923 Todesco M., Owens G. L., Bercovich N., Légaré J.-S., Soudi S., Burge D. O., Huang K., Ostevik K. L.,  
924 Drummond E. B. M., Imerovski I., Lande K., Pascual M. A., Cheung W., Staton S. E., Muñoz S.,  
925 Nielsen R., Donovan L. A., Burke J. M., Yeaman S., Rieseberg L. H., 2019 Massive haplotypes  
926 underlie ecotypic differentiation in sunflowers. *bioRxiv*: 790279.
- 927 Trickett A. J., Butlin R. K., 1994 Recombination suppressors and the evolution of new species. *Heredity*  
928 **73**: 339–345.
- 929 Van der Auwera G. A., Carneiro M. O., Hartl C., Poplin R., del Angel G. *et al.*, 2013 From fastQ data to  
930 high-confidence variant calls: The genome analysis toolkit best practices pipeline. *Current*  
931 *Protocols in Bioinformatics* **43**: 11.10.1–33.
- 932 Vitte C., Fustier M. A., Alix K., Tenaillon M. I., 2014 The bright side of transposons in crop evolution.  
933 *Briefings in Functional Genomics* **13**: 276–295.
- 934 Vogel J. P., Garvin D. F., Mockler T. C., Schmutz J., Rokhsar D. *et al.*, 2010 Genome sequencing and  
935 analysis of the model grass *Brachypodium distachyon*. *Nature* **463**: 763–768.
- 936 Weiss-Schneeweiss H., Schneeweiss G. M., 2012 Karyotype Diversity and Evolutionary Trends in

- 937 Angiosperms. In: *Plant Genome Diversity Volume 2* pp. 209-230.
- 938 Whelan E. D., 1979 Interspecific hybrids between *Helianthus petiolaris* Nutt. and *H. annuus* L.: Effect of  
939 backcrossing on meiosis. *Euphytica* **28**: 297-308.
- 940 White M. J. D., 1973 *Animal Cytology and Evolution*. Cambridge University Press, London.
- 941 White M. J. D., 1978 *Modes of Speciation*. W. H. Freeman & Co., San Francisco.
- 942 Wu F., Tanksley S. D., 2010 Chromosomal evolution in the plant family Solanaceae. *BMC Genomics* **11**:  
943 182.
- 944 Yeaman S., 2013 Genomic rearrangements and the evolution of clusters of locally adaptive loci.  
945 *Proceedings of the National Academy of Sciences* **110**: E1743–E1751.
- 946 Yeaman S., Whitlock M., 2011 The genetic architecture of adaptation under migration-selection  
947 balance. *Evolution* **65**: 1897–1911.
- 948 Yogeewaran K., Frary A., York T. L., Amenta A., Lesser A. H., Nasrallah J. B., Tanksley S. D., Nasrallah M.  
949 E., 2005 Comparative genome analyses of *Arabidopsis* spp.: inferring chromosomal rearrangement  
950 events in the evolutionary history of *A. thaliana*. *Genome Research* **15**: 505–515.
- 951 Zanders S. E., Eickbush M. T., Yu J. S., Kang J.-W., Fowler K. R., Smith G. R., Malik H. S., 2014 Genome  
952 rearrangements and pervasive meiotic drive cause hybrid infertility in fission yeast. *eLife* **3**: 419–  
953 23.
- 954 Zhulidov P. A., 2004 Simple cDNA normalization using kamchatka crab duplex-specific nuclease. *Nucleic  
955 Acids Research* **32**: 37e–37.
